# Supplementary material for: Targeting the TNFα/TNFR1 axis alleviates the experimental acute pancreatitis
Source: Research Square preprint supplement (doi:10.21203/rs.3.rs-8003658/v1), 2025-11-25
Supplement: Supplementary file 1 [file 7a370b49ff1d80e4cb8c0b74.xlsx]

## Sheet: Sheet1
Supplementary Table 1. The primary antibodies used in this study
Antibody	Source	Catalogue number	Application	Working dilution
TNF-α	Santa Cruze	sc-52746	IHC	1:50
TNFR1	abcolonal	A1540	WB	1:1000
			IHC	1:50
MPO	Abcam	ab20867	IHC	1:1000
F4/80	Servicebio	GB113373-100	IHC	1:1000
MPO	R&D System	AF3667	IF	1:500
CITH3	Abcam	ab5103	IF	1:100,
S100A9	abcam	ab24295	IF	1:1000
LYZ	abcam	ab108508	IF	1:400
AMYLASE	santa cruze	sc-46657	IF	1:100
MARCKSL1	santa cruze	sc-130471	IF	1:500
P65	Proteintech	80979-1-RR	WB	1:1000
p-P65	Proteintech	82335-1-RR	WB	1:1000
STAT3	Proteintech	10253-2-AP	WB	1:1000
p-STAT3	Proteintech	60479-1-Ig	WB	1:1000
CD11b-PE-Cy7	BioLegend	101215	Flow Cytometry	0.0763889
F4/80-PE	BD Biosciences	565410	Flow Cytometry	0.0763889
Ly6G-PerCP-Cy5.5	BD Biosciences	560602	Flow Cytometry	0.0763889
