# Supplementary material for: Targeting the TNFα/TNFR1 axis alleviates the experimental acute pancreatitis
Source: Research Square preprint supplement (doi:10.21203/rs.3.rs-8003658/v1), 2025-11-25
Supplement: Supplementary file 2 [file b2ef8833b1153d8eb4cc37b1.xlsx]

## Sheet: Table S3
Supplementary table 3. The significantly differentially upregulated genes in the TNFR1-/- group when compared to the WT group.
gene_id	Tnfr1_1	Tnfr1_2	Tnfr1_3	Tnfr1_4	Tnfr1_5	WT_1	WT_2	WT_3	WT_4	WT_5
Ccl21b	0	3.03	5.11	8.48	8.48	38.28	75.48	22.67	36.11	27.68
Rab44	6	13	21	2	24	59	47	37	77	112
Mfap4	17	15	6	10	37	73	128	39	124	91
Oas3	9	21	29	13	38	204	102	50	74	86
Ctse	9	13	31	11	16	67	88	27	138	55
Treml2	8	25	64	13	25	129	109	54	110	138
Postn	149	303	329	216	637	1415	1078	621	1559	1089
Il1b	8	35	17	14	25	85	92	44	78	77
Fam83d	5	2	2	1	2	16	17	8	24	19
Tnfrsf1a	253	384	512	327	454	1783	954	788	1100	1345
Ccnb2	10	5	9	1	12	19	50	29	51	26
Gpnmb	65	208	232	55	262	484	273	426	690	1037
Col1a1	2248	3509	4994	1478	4746	13936	9398	4508	9922	11948
Phf11a	5.95	10	5.01	7	4	18.83	36.85	35.96	18.99	28.89
Apoe	1511	2392	3307	1140	2914	4416	5058	5521	6678	9073
Gabrp	4	1	5	10	11	31	16	23	33	33
Tnc	53	116	223	56	187	1197	224	233	573	595
Fcrl2	45	62	101	34	95	221	112	109	263	285
Cilp	52	79	56	45	102	254	189	89	180	245
Slc4a11	6	8	16	11	24	63	34	24	39	53
Fhl2	19	29	20	26	25	103	58	39	68	77
Thbs4	1	0	1	1	0	13	12	7	27	6
Timp1	244	565	914	376	530	951	1944	959	1792	1296
Cyp4f18	19	95	84	23	67	167	130	120	179	230
Cxcr4	31	87	106	39	98	199	137	115	235	267
AI467606	18	30	59	14	22	63	93	49	108	91
Ckap2l	25	27	32	13	25	56	69	42	83	69
Dok3	29	99	124	39	63	187	190	127	196	226
Il21r	17	49	77	26	62	159	103	73	129	140
Irf7	68	96	160	93	154	485	402	170	235	214
Runx3	5	20	27	5	15	80	27	26	46	64
Siglecf	2	17	6	3	14	24	20	28	47	57
Pdlim7	79	142	171	92	198	497	315	252	283	288
Slc13a3	7	12	34	13	21	61	294	25	168	59
Gpr65	21	38	48	15	48	80	69	72	110	90
Oas1a	43.6	84.41	140.66	75.3	137.71	315.31	280.6	161.64	211.99	210.71
Marcksl1	40	107	160	80	128	266	278	183	261	249
Ifit1	29	19	41	28	44	162	101	39	61	99
Ifit3	55.02	55.16	75.58	64.59	103.55	335.29	256.73	94.94	120.78	165.53
Slc15a3	91.56	233.61	288.81	80.92	220.43	623.27	356.24	288.05	465.56	504.22
Aplnr	43	63	59	34	63	195	101	74	119	144
Fbn2	18	31	32	11	29	127	56	26	95	57
Ccdc88b	20	72	100	18	106	222	177	88	208	233
Rgs16	7	8	7	3	5	24	13	12	25	35
Phf11b	10	32	40	14	29	56	90.09	43	67	80
Cx3cr1	43	141	106	24	154	338	175	181	332	283
Mki67	89	122	148	82	183	301	325	172	335	277
Acta2	194.01	119	151.01	141	135	476	247	236	436	379
Itm2a	48	57	39	38	51	84	150	119	98	124
Obsl1	93	91	117	97	96	266	206	165	213	235
Cdc20	14	19	22	13	39	47	87	34	66	61
Vill	256	360	439	266	403	958	869	484	772	667
Ifi209	30	72	101	42	75	237.95	150	97	136.98	141
Apol7a	194	166	178	222	126	89	50	88	99	62
Kcnd3	104	42	63	45	46	23	14	20	36	19
Kif5c	59	59	50	37	32	27	18	17	16	17
Acvr1c	47	30	45	16	29	9	3	3	22	2
Hnmt	135	133	145	124	130	55	55	56	74	74
Aqp11	113	115	133	110	114	54	49	40	74	53
Flrt2	497	457	668	251	409	167	172	104	330	194
Arg2	102.69	120	132.34	183.4	93.32	42	47.12	61.12	51	51.16
Cpm	90	66	108	85	75	22	29	26	54	43
Thrb	133	92	121	94	107	42	38	38	67	55
Lyve1	204	119	317	140	217	88	56	56	124	98
Lifr	1305	1161	1878	1483	1368	733	610	532	781	678
Bhlha15	1772	1081	1200	1551	951	286	673	452	592	503
Cfap92	41.83	19	12	28	31	4	9	5.78	8	6.7
Slc6a15	47	22	14	38	22	8	2	11	6	7
Cmbl	42	29	51	38	37	6	10	17	19	15
Mest	1166.62	727.6	648.11	633.41	1006.7	386.7	88.82	401.23	255.3	350.13
Angptl1	69	31	43	85	19	6	16	12	14	14
Btnl9	103	44	99	62	71	36	13	24	34	34
Cd163	269	191	631	255	448	211	45	62	156	154
Sult1a1	67	33	57	47	74	14	16	23	22	19
Foxred2	315	209	270	267	233	129	70	91	116	117
Slc6a4	91	155	127	113	104	38	32	32	52	71
Tmprss13	37	23	39	29	29	10	9	9	12	11
Ttpa	135	105	94	103	65	22	35	26	47	43
Lcat	54	29	37	47	40	12	14	9	18	14
Pdk4	206	97	228	133	222	79	42	33	95	56
A1cf	47	25	37	33	16	10	6	3	14	7
D17H6S56E-5	4462.28	5895	10299	4465	6461	3063.03	1400.44	1163	2672	2169
Iyd	78	85	90	71	96	39	26	11	19	19
Snhg11	84.11	31	56	35	46	3	5	9	11.02	14
Kcnj15	555.95	450	717.81	473.92	325	160	91	36	143	84
