# Supplementary material for: Targeting the TNFα/TNFR1 axis alleviates the experimental acute pancreatitis
Source: Research Square preprint supplement (doi:10.21203/rs.3.rs-8003658/v1), 2025-11-25
Supplement: Supplementary file 3 [file f3c5bcfd6fd23eba1aeb6901.xlsx]

## Sheet: Sheet1
Supplementary Table 2. Sequences of primers
Gene name	Species	Sequences
		Forward	Reverse
Tnfrsf1a F1/R1	mouse	5′-CTTCCTTTTGTTTCTGTCCCG-3′	5′-TCTAAAGCAGCAACGCCAAC-3′
Tnfrsf1a F2/R2	mouse	5′-CTCCCTTCAACTTGATTTCCC-3′	5′-CTTGGTCTCTGGTGGCTCTGT-3′
Il-1β	mouse	5'-GAAATGCCACCTTTTGACAGTG-3'	5'-TGGATGCTCTCATCAGGACAG-3'
Tnf-α	mouse	5'-CAGGCGGTGCCTATGTCTC-3'	5'-CGATCACCCCGAAGTTCAGTAG -3'
Il-6	mouse	5'-CTGCAAGAGACTTCCATCCAG-3'	5'-AGTGGTATAGACAGGTCTGTTGG-3'
Ifi209	mouse	5′-ACCATCTCAAACTATGTTGGCTG-3′	5′-TGGTTCGCCATCATTTACCTC-3′
Gpr65	mouse	5′-CGCCACCTCGAACACTATTTG-3′	5′-GCATAAAGATCCGATGTTGGCT-3′
Marcksl1	mouse	5′-CCACCCGTGAACGGAACAG-3′	5′-GGCCACTCAATTTGAAAGGCTT-3′
Cxcr4	mouse	5′-GACTGGCATAGTCGGCAATG-3′	5′-AGAAGGGGAGTGTGATGACAAA-3′
Ifit3	mouse	5′-CCTACATAAAGCACCTAGATGGC-3′	5′-ATGTGATAGTAGATCCAGGCGT-3′
Treml2	mouse	5′-AGAACCGCCGGAACTTAGTTG-3′	5′-TGATACGGACTACCTTGACCTTG-3′
Bhlha15	mouse	5′-TGACCGCCACCATACTTACTA-3′	5′-GCTGGTATAATTTAGGGCCTGG-3′
Acvr1c	mouse	5′-ATGCTAACCAACGGGAAAGAG-3′	5′-GGAAGGTGCAGTGTGATATTGT -3′
